- reduces the shivering threshold in humans. *Br J Anaesth* 2005; 94:756–62
38. Chacko SA, Song Y, Nathan L, Tinker L, de Boer IH, Tylavsky F, Wallace R, Liu S: Relations of dietary magnesium intake to biomarkers of inflammation and endothelial dysfunction in an ethnically diverse cohort of postmenopausal women. *Diabetes Care* 2010; 33:304–10
  39. Doyle LW, Crowther CA, Middleton P, Marret S: Antenatal magnesium sulfate and neurologic outcome in preterm infants: A systematic review. *Obstet Gynecol* 2009; 113:1327–33
  40. Conde-Agudelo A, Romero R: Antenatal magnesium sulfate for the prevention of cerebral palsy in preterm infants less than 34 weeks' gestation: A systematic review and metaanalysis. *Am J Obstet Gynecol* 2009; 200:595–609
  41. Costantine MM, Weiner SJ, Eunice Kennedy Shriver National Institute of Child Health and Human Development Maternal-Fetal Medicine Units Network: Effects of antenatal exposure to magnesium sulfate on neuroprotection and mortality in preterm infants: A meta-analysis. *Obstet Gynecol* 2009; 114(2 pt 1):354–64
  42. Lieberman E, Lang J, Richardson DK, Frigoletto FD, Heffner LJ, Cohen A: Intrapartum maternal fever and neonatal outcome. *Pediatrics* 2000; 105(1 pt 1):8–13
  43. Roberts DJ, Celi AC, Riley LE, Onderdonk AB, Boyd TK, Johnson LC, Lieberman E: Acute histologic chorioamnionitis at term: Nearly always noninfectious. *PLoS One* 2012; 7:e31819
  44. Verani JR, McGee L, Schrag SJ; Division of Bacterial Diseases, National Center for Immunization and Respiratory Diseases, Centers for Disease Control and Prevention (CDC): Prevention of perinatal group B streptococcal disease: Revised guidelines from CDC, 2010. *MMWR Recomm Rep* 2010; 59(RR-10):1–36

## ANESTHESIOLOGY REFLECTIONS FROM THE WOOD LIBRARY-MUSEUM

Christmas Suspense about Hosting the Columbian Exposition...and, Indirectly, the “Post-Graduate School of Anaesthesia”

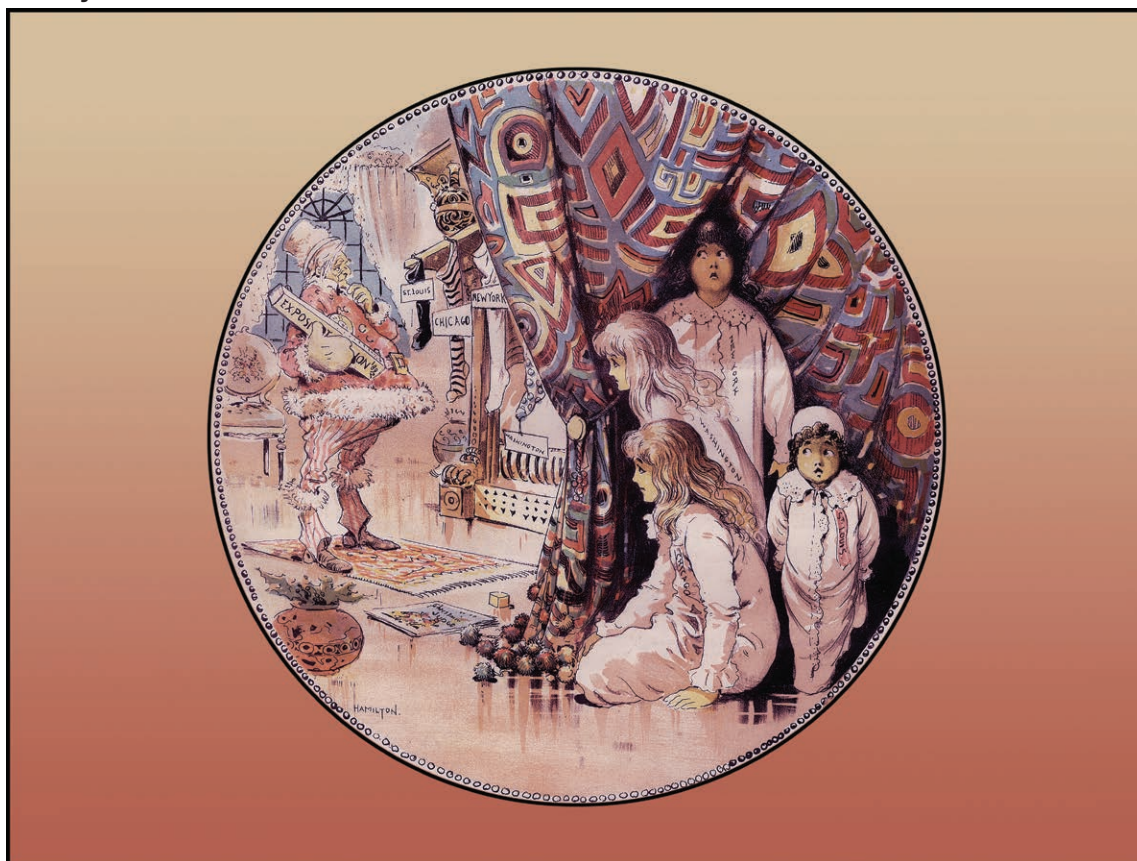

Hiding from Santa Claus behind the curtain, four children populate a circular illustration that is suspended like a Christmas tree ornament on the cover of the December 28, 1889, issue of *Judge*, a weekly magazine of political satire. Dangling from the fireplace mantle are four Christmas stockings labeled with the names of St. Louis, Chicago, New York, and Washington—each a city hoping that Santa would fill that city's stocking with the job of hosting the Columbian Exposition. Signed “[Grant E.] Hamilton” by its political cartoonist, the illustration was captioned: “SUSPENSE! Which one will get the fair?” Eventually, Chicago won the bid for the 1893 Columbian Exposition. Once the Exposition was underway, Chicago's “Post-Graduate School of Anaesthesia” would hold classes weekday mornings but leave afternoons available for the postgraduate physicians and dentists to attend the world's fair. (Copyright © the American Society of Anesthesiologists' Wood Library-Museum of Anesthesiology.)

George S. Bause, M.D., M.P.H., Honorary Curator and Laureate of the History of Anesthesia, Wood Library-Museum of Anesthesiology, Schaumburg, Illinois, and Clinical Associate Professor, Case Western Reserve University, Cleveland, Ohio. UJYC@aol.com.
